# Supplementary material
Source: publisher figshare collection journal article supplement (https://wiley.figshare.com/articles/dataset/_/5897134)

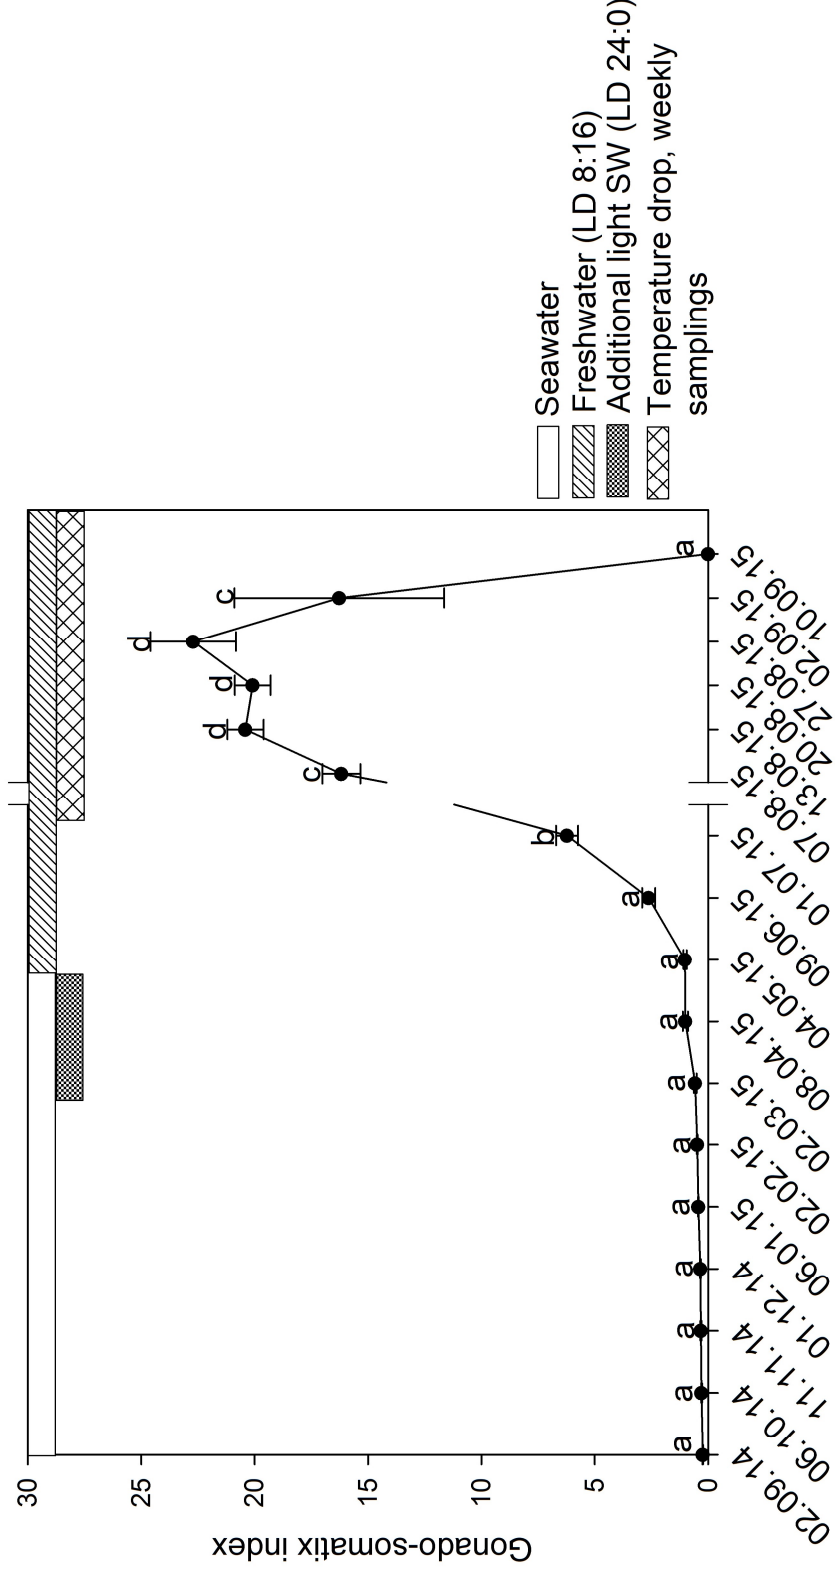

Supplement: Supplementary file 1 [file 1]

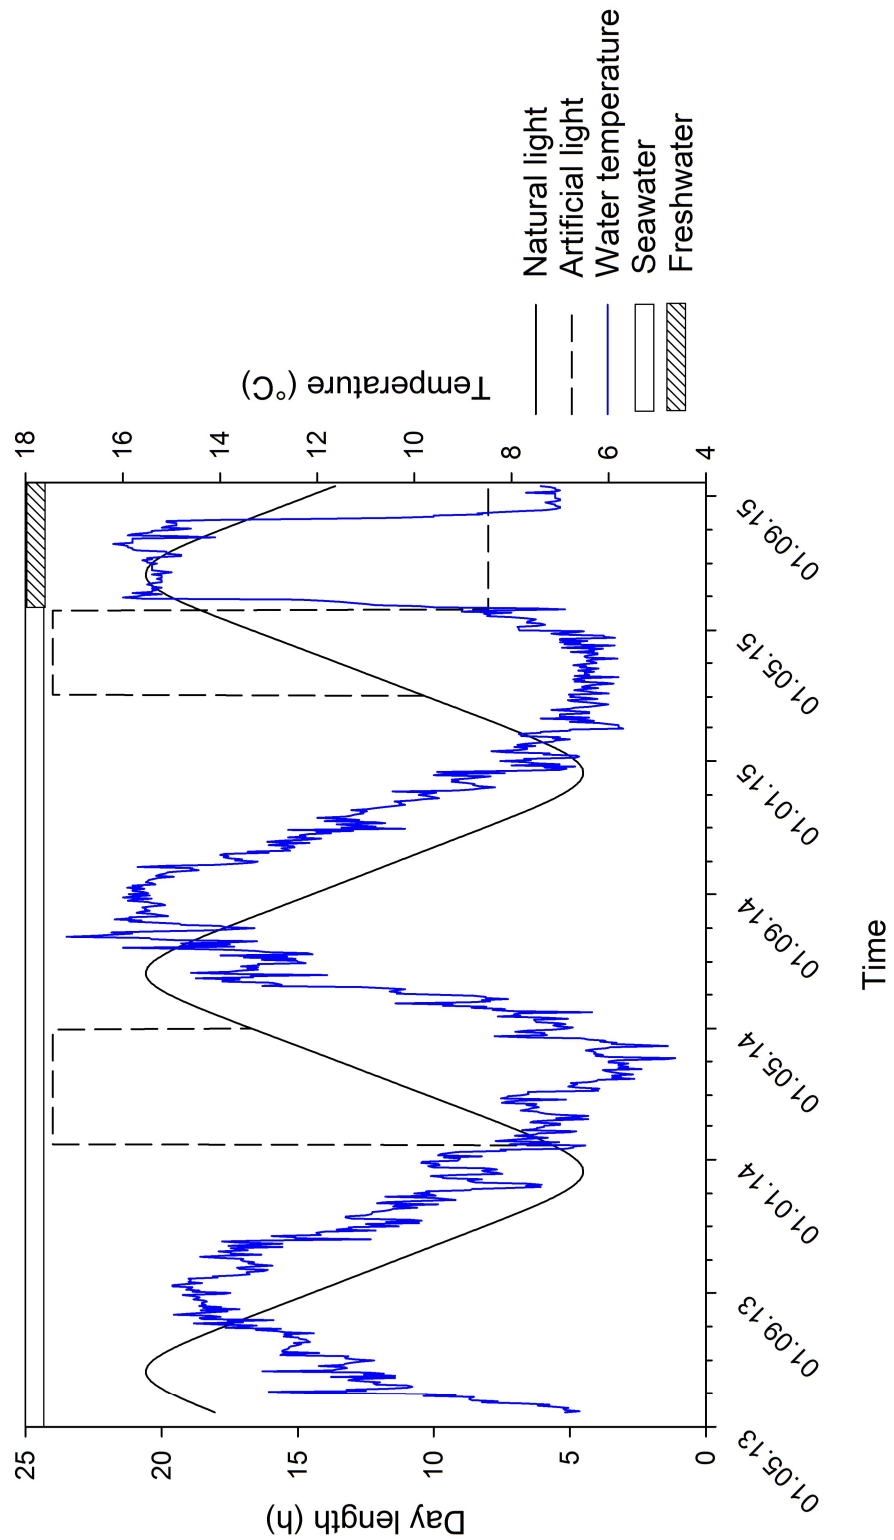

Supplement: Supplementary file 2 [file 1]

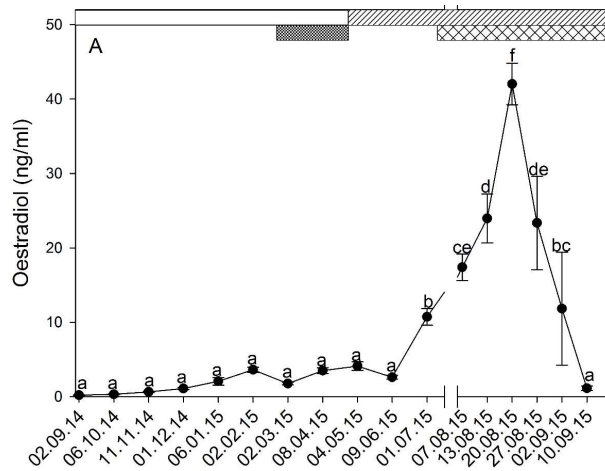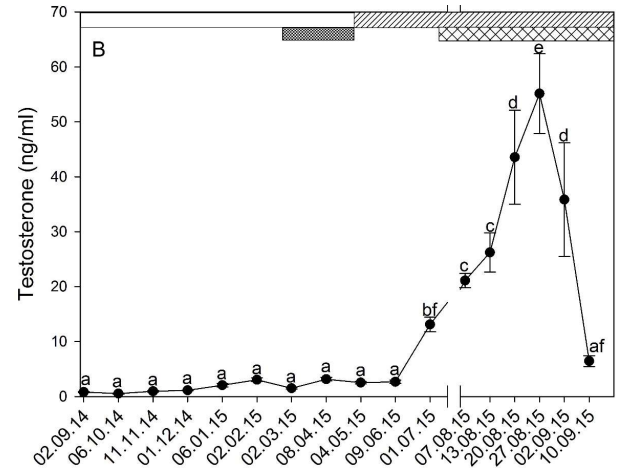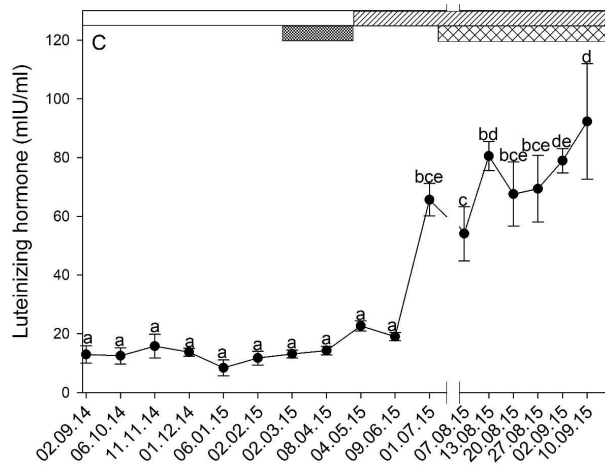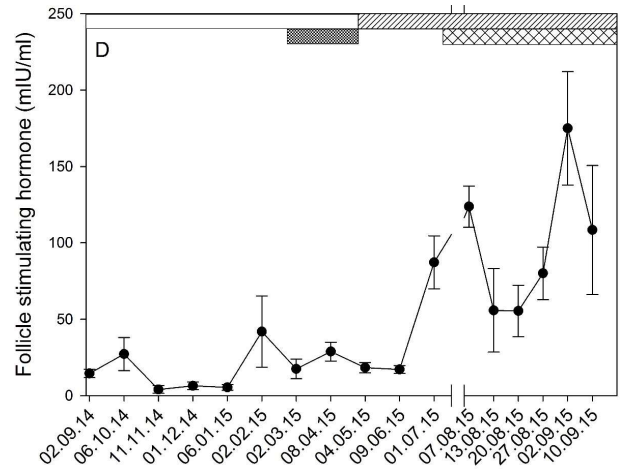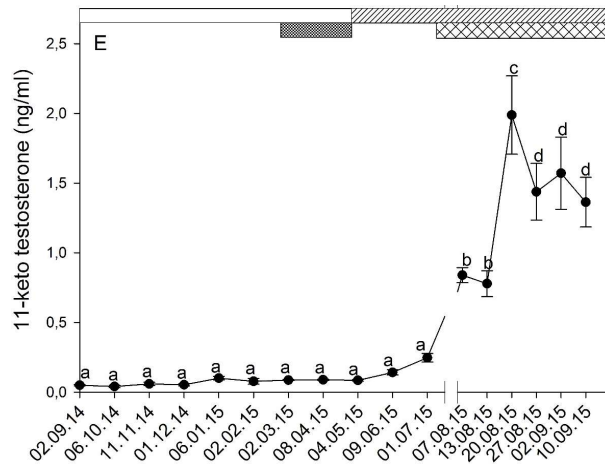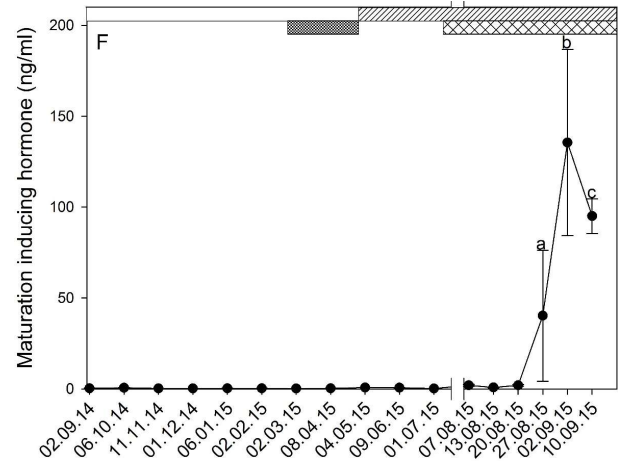

Seawater
  Additional light SW (LD 24:0)
  Freshwater (LD 8:16)
  Temperature drop, weekly samplings

Supplement: Supplementary file 3 [file 1]
